# Supplementary material for: Selective growth of gold nanoparticles onto tellurium nanowires via a green chemical route
Source: Royal Society of Chemistry journal article supplement (doi:10.1039/b801696h), 2008-01-01
Supplement: b801696h.pdf [file b801696h.pdf]

*Supporting Information*

**Selective Growth of Gold Nanoparticles onto Tellurium Nanowires via a Green Chemical Route**

Zong-Hong Lin, Yang-Wei Lin, Kun-Hong Lee, and Huan-Tsung Chang\*

Department of Chemistry, National Taiwan University, Taipei, Taiwan

\*To whom correspondence should be addressed: changht@ntu.edu.tw

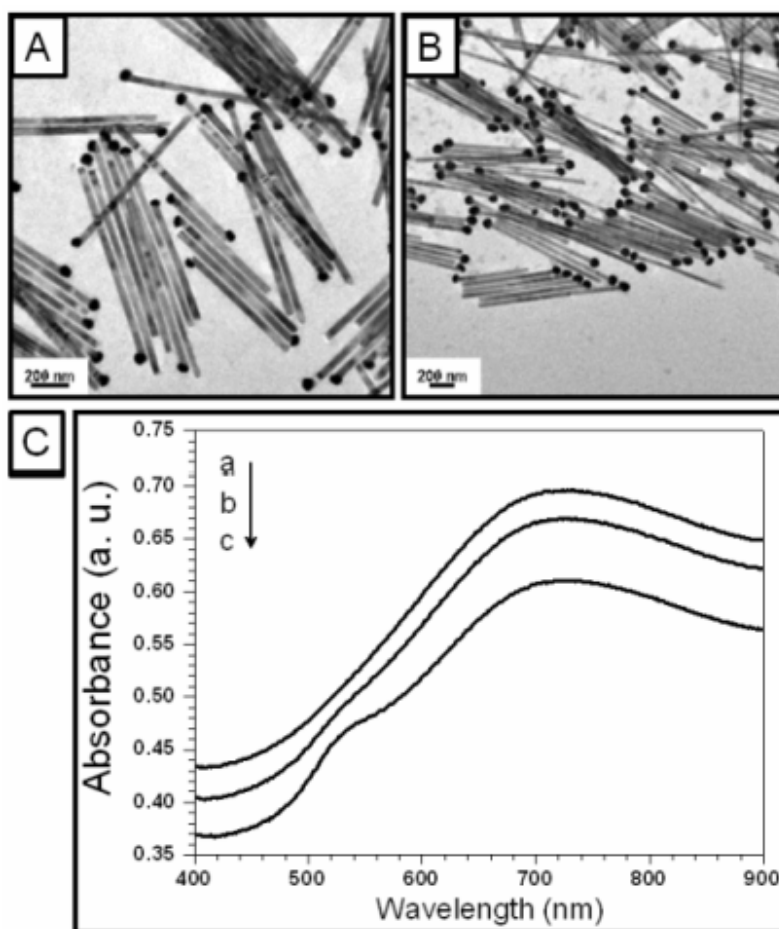

**Figure S1.** (A, B) TEM images of high-purity Au-Te NWs having (A) 50- and (B) 70-nm Au NP tips. (C) UV-Vis absorption spectra of (a) Te NWs and (b, c) Au-Te NWs having (b) 50- and (c) 70-nm Au NP tips.

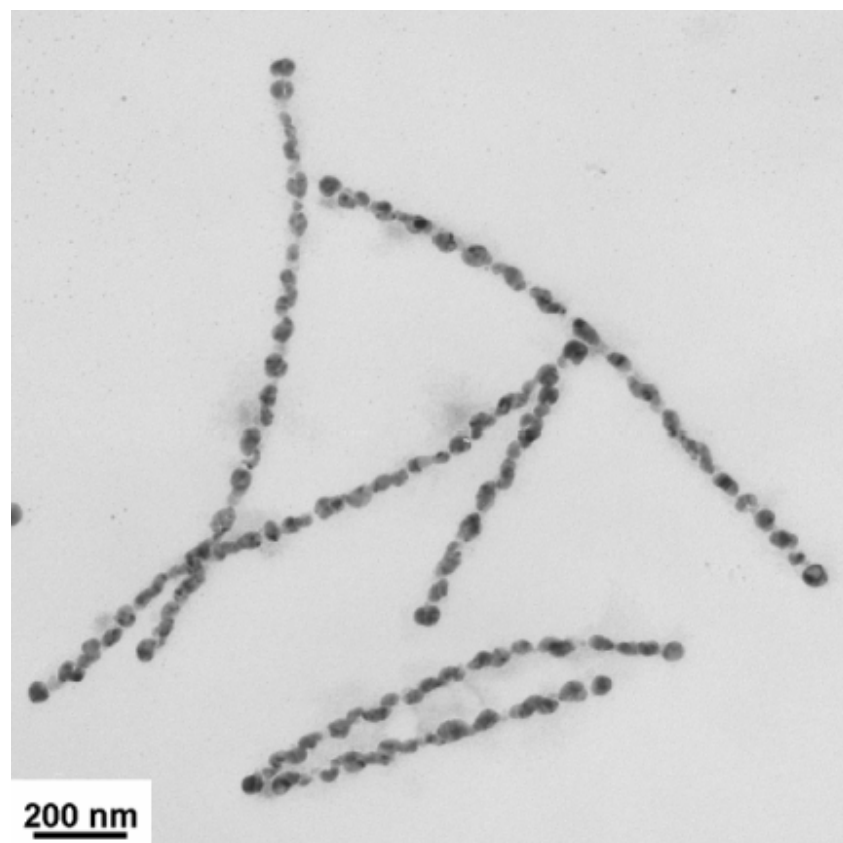

**Figure S2.** TEM image of the Au-Te nanomaterials prepared in solution at pH 7.0 in the presence of 10 mM CTAB. Au atoms were deposited at various positions along the Te NWs to form Au-Te nanopeapods.
